# Supplementary figures and images for: The Effects of 6-Month Vitamin D Supplementation during the Non-Surgical Treatment of Periodontitis in Vitamin-D-Deficient Patients: A Randomized Double-Blind Placebo-Controlled Study
Source: MDPI journal article supplement (doi:10.3390/nu12102940), 2020-09-25

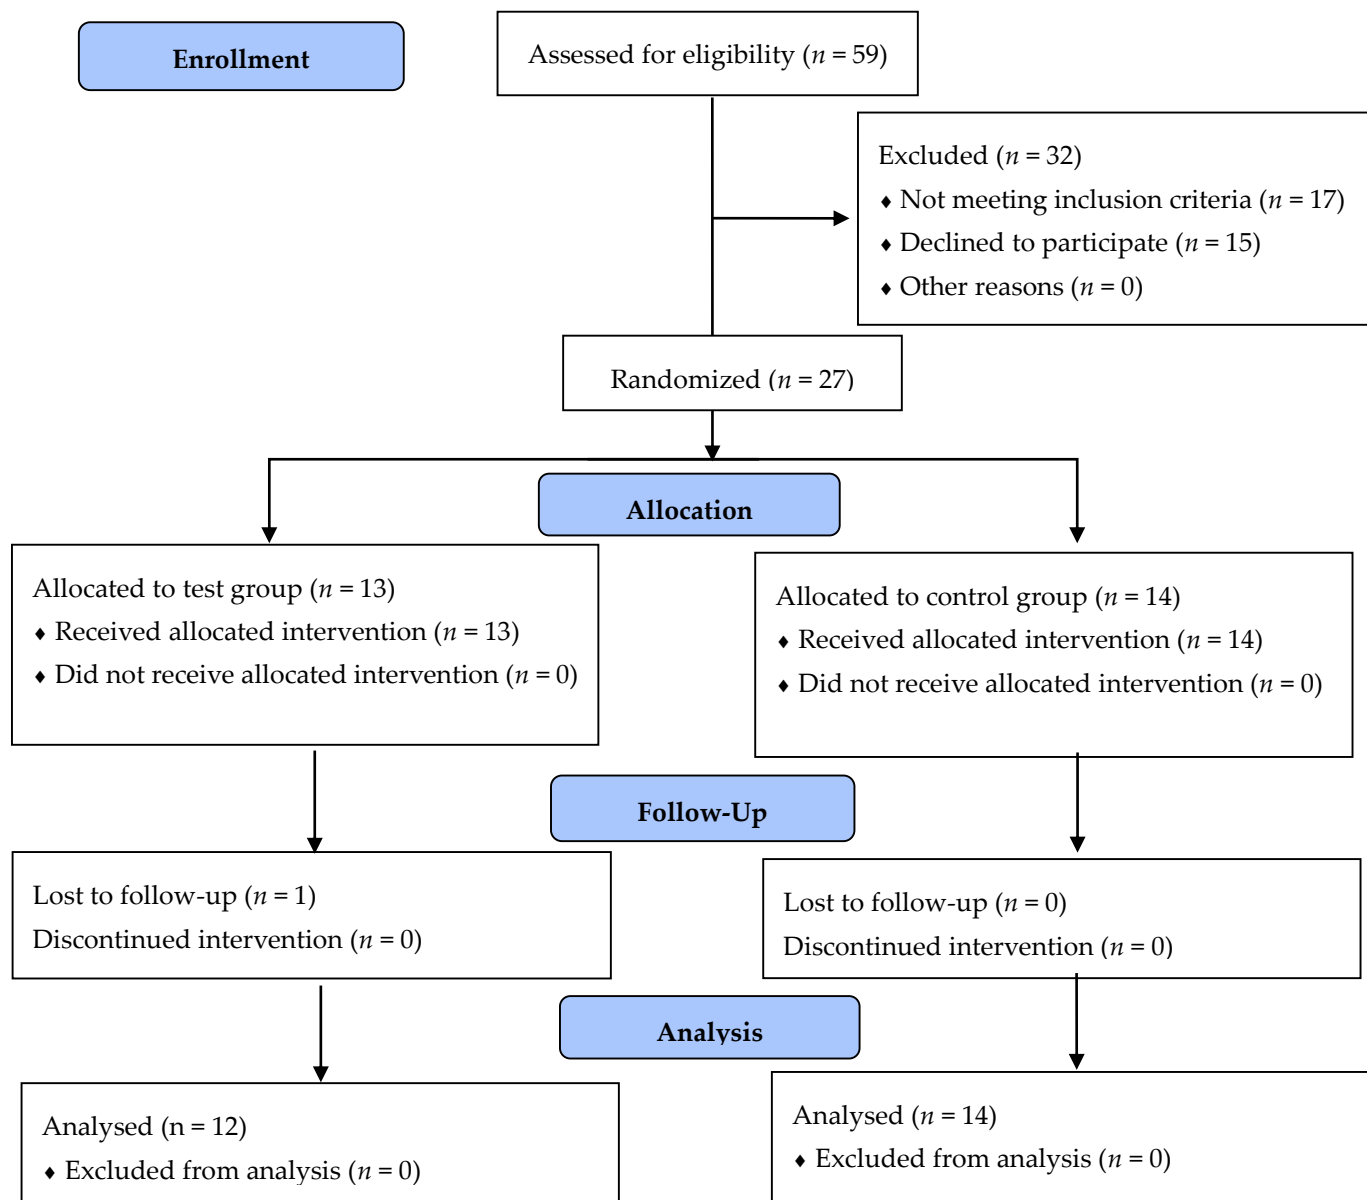

**Figure S1.** Consort flow chart.

Supplement: s1 [file s1]
